# Supplementary material for: Factors associated with interest in a long-acting HIV regimen: perspectives of people living with HIV and healthcare providers in four European countries
Source: HighWire-hosted journal article supplement (doi:10.1136/sextrans-2020-054648), 2021-02-25
Supplement: sextrans-2020-054648supp002_data_supplement.pdf [file sextrans-2020-054648supp002_data_supplement.pdf]

Supplemental Figure 2. Degree of willingness among HIV physicians to offer a novel long-acting HIV regimen to their HIV+ patients

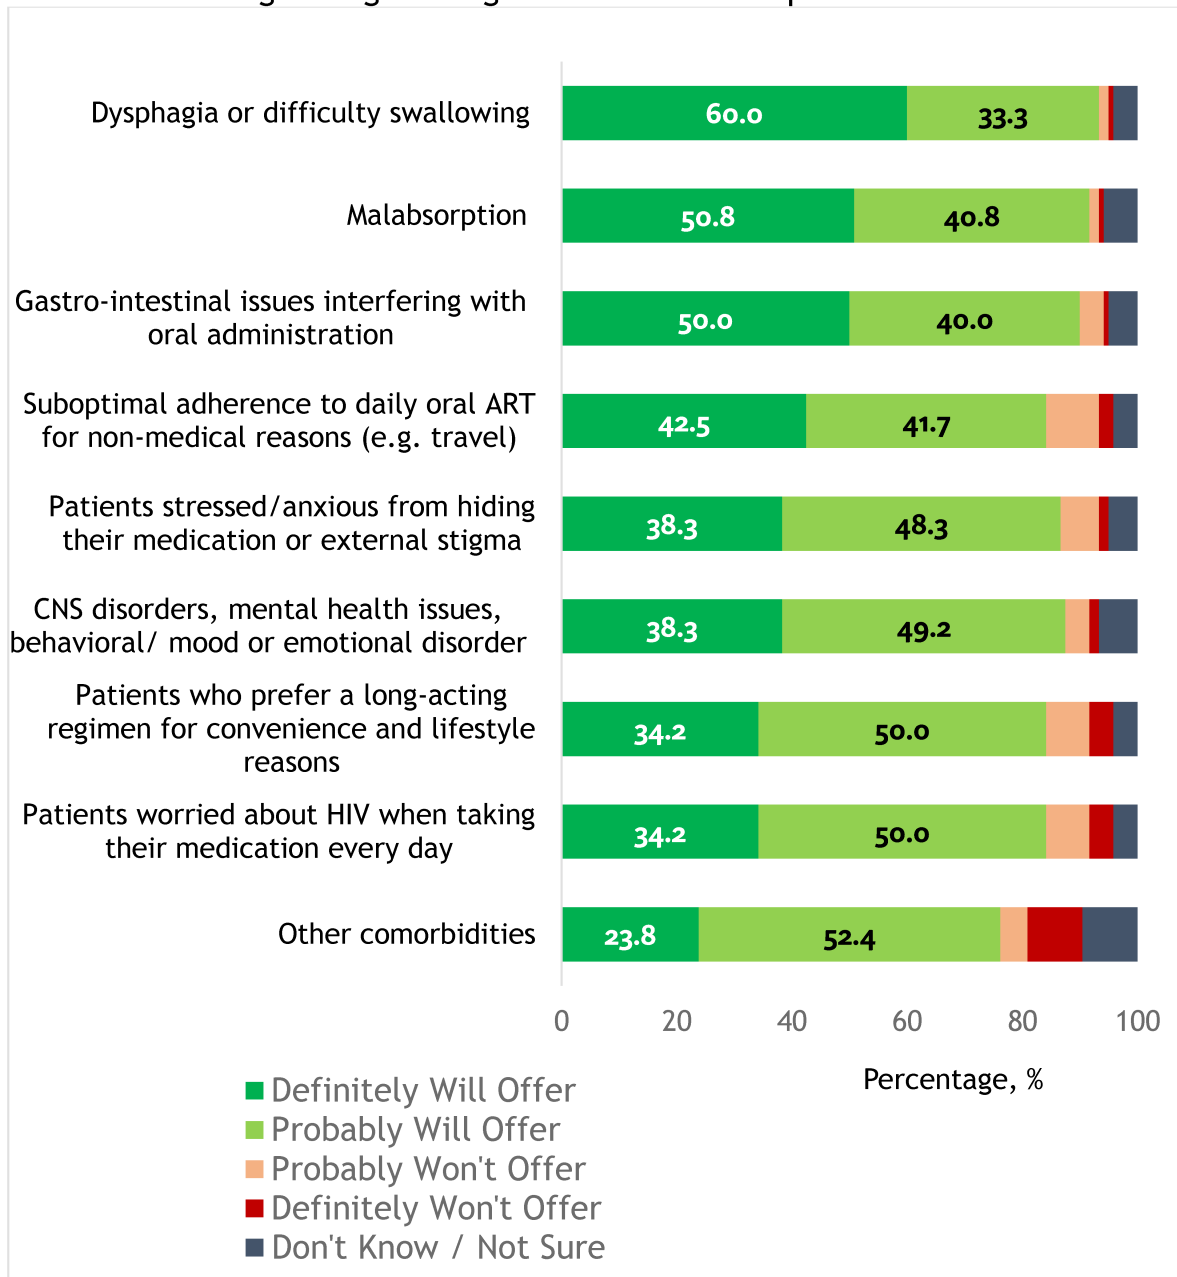

Note: ART = antiretroviral therapy.
