# Supplementary material for: Factors associated with interest in a long-acting HIV regimen: perspectives of people living with HIV and healthcare providers in four European countries
Source: HighWire-hosted journal article supplement (doi:10.1136/sextrans-2020-054648), 2021-02-25
Supplement: sextrans-2020-054648supp003_data_supplement.pdf [file sextrans-2020-054648supp003_data_supplement.pdf]

## Supplemental Table 1. Preamble to Survey questions assessing preference for a long-acting HIV treatment (regimen Z) among people living with HIV

Below is the description of a hypothetical new product for treating HIV infection and we would like to ask you a few questions about your preferences. Please note this is a completely hypothetical product, which may or may not be available to you in the future.

Please read the description of Regimen Z below carefully so that you can answer the questions that follow.

- Regimen Z is a complete, long-acting injectable HIV regimen
  - For people living with HIV who are currently undetectable/virally suppressed and expected to be sensitive to the active components
  - Given once every 2 months
    - The injections are administered around the same day of the month
    - Injections can be given as much as 7 days prior or 7 day following the planned injection date, as needed
  - Given by a nurse, doctor, or other healthcare professional
    - 2 injections are given during the same visit in the gluteal muscle (buttocks)
  - Once injections are started, there is no need for any other pills or medications to treat HIV
- Regimen Z is expected to be as effective at keeping patients undetectable as other HIV treatments in clinical trials
  - Most people experience a mild pain when getting the injection. If there is soreness, it typically lasts 3 days or less
  - Side effects are uncommon. When experienced, they are usually mild to moderate. Most common side effects (other than pain when getting the injection) are fatigue, fever, headache, and nausea.
  - Most patients considered the pain when receiving the injections as “totally” or “very” acceptable
  - Patients who enrolled in clinical trials preferred the long-acting injectable treatment compared to their prior daily oral regimen leading to very low discontinuation rates.

For the purpose of this questionnaire, we assume Regimen Z comes at similar cost to you compared to your current treatment.
